# Supplementary material
Source: PubMed Central journal article supplement (PMC6714026)
Supplement: jamapsychiatry-76-1176-s001.pdf [file jamapsychiatry-76-1176-s001.pdf]

## Supplementary Online Content

Amlung M, Marsden E, Holshausen K, et al. Delay discounting as a transdiagnostic process in psychiatric disorders: a meta-analysis. *JAMA Psychiatry*. Published online August 28, 2019. doi:10.1001/jamapsychiatry.2019.2102

**eTable 1.** Complete List of Search Terms

**eTable 2.** Raw Data Used to Calculate Effect Size (Hedges  $g$ ) for Each Study

**eTable 3.** Complete Meta-analytic Results by Disorder Category

**eTable 4.** Studies Excluded at Full-Text Stage with Reasons for Exclusion

This supplementary material has been provided by the authors to give readers additional information about their work.

**eTable 1.** Complete List of Search Terms

|                                |                                                                                                                                                                                                                                                                                                                                                                                                                                             |
|--------------------------------|---------------------------------------------------------------------------------------------------------------------------------------------------------------------------------------------------------------------------------------------------------------------------------------------------------------------------------------------------------------------------------------------------------------------------------------------|
| Discounting Keywords (Group 1) | Delay discounting OR temporal discounting OR intertemporal choice.                                                                                                                                                                                                                                                                                                                                                                          |
| Psychiatric Keywords (Group 2) | Psychiatric OR Mood Disorder OR Depress* OR Bipolar OR Mania OR Manic OR Schiz* OR Psychosis OR Psychotic OR Delusional OR Anxiety OR Post traumatic stress disorder OR PTSD OR Acute stress disorder OR Phobia OR Panic OR Obsessive compulsive OR OCD OR Hoarding OR Eating disorder OR Anorexia OR Bulimia OR Binge eating OR Body dysmorphic OR Personality disorder OR Borderline OR Antisocial OR Dependent OR Somatoform OR Somatic. |
| Final Search String            | (Group 1) AND (Group 2)                                                                                                                                                                                                                                                                                                                                                                                                                     |

*Note:* PTSD and OCD were entered into the search as acronyms as stated

**eTable 2.** Raw Data Used to Calculate Effect Size (Hedges g) for Each Study

| <b>Study</b>                     | <b>Data Used to Calculate g</b>                                                                                                                      |
|----------------------------------|------------------------------------------------------------------------------------------------------------------------------------------------------|
| <b>Major Depressive Disorder</b> |                                                                                                                                                      |
| Brown et al. 2018                | Clinical: $M(SD)$ , $N = -4.94(2.46)$ , 32<br>Control: $M(SD)$ , $N = -5.51(2.12)$ , 61                                                              |
| Caceda et al. 2014               | Clinical: $M(SD)$ , $N = 0.08(0.02)$ , 20<br>Control: $M(SD)$ , $N = 0.07(0.02)$ , 20                                                                |
| Dombrowski et al. 2011           | Clinical: $M(SD)$ , $N = -5.35(1.24)$ , 42<br>Control: $M(SD)$ , $N = -5.64(1.54)$ , 31                                                              |
| Engelmann et al. 2013            | Clinical: $M(SD)$ , $N = 1.37(0.99)$ , 11<br>Control: $M(SD)$ , $N = 0.66(0.57)$ , 15                                                                |
| Imhoff et al. 2014               | Clinical: $M(SD)$ , $N = 0.78(0.25)$ , 20<br>Control: $M(SD)$ , $N = 0.53(0.32)$ , 20                                                                |
| Pulcu et al. 2014                | Clinical: $M(SD)$ , $N = 0.04(0.07)$ , 24<br>Control: $M(SD)$ , $N = 0.02(0.03)$ , 29                                                                |
| Weidberg et al. 2015             | Clinical: $M(SD)$ , $N = 0.01(6.27)$ , 30<br>Control: $M(SD)$ , $N = 0.01(2.98)$ , 65                                                                |
| <b>Schizophrenia</b>             |                                                                                                                                                      |
| Ahn et al. 2011                  | Clinical: $M(SD)$ , $N = -2.33(2.10)$ , 21<br>Control: $M(SD)$ , $N = -4.68(1.80)$ , 30                                                              |
| Avsar et al. 2013                | Clinical: $M(SD)$ , $N = -0.17(0.67)$ , 14<br>Control: $M(SD)$ , $N = -1.91(0.67)$ , 14                                                              |
| Brown et al. 2018                | Clinical: $M(SD)$ , $N = -3.65(3.55)$ , 31<br>Control: $M(SD)$ , $N = -5.51(2.12)$ , 61                                                              |
| Heerey et al. 2007               | Clinical: $M(SD)$ , $N = 0.05(0.07)$ , 42<br>Control: $M(SD)$ , $N = 0.01(0.02)$ , 29                                                                |
| Heerey et al. 2011               | Clinical: $M(SD)$ , $N = 0.11(0.14)$ , 37<br>Control: $M(SD)$ , $N = 0.06(0.09)$ , 24                                                                |
| Horan et al. 2017                | Clinical: $M(SD)$ , $N = 0.73(0.25)$ , 131<br>Control: $M(SD)$ , $N = 0.75(0.23)$ , 70                                                               |
| MacKillop et al. 2011a (Small)   | Clinical: $M(SD)$ , $N = 0.03(0.10)^*$ , 23<br>Control: $M(SD)$ , $N = 0.07(0.09)^*$ , 24<br><br>*Estimated marginal means, see paper for covariates |

|                                        |                                                                                                                                                  |
|----------------------------------------|--------------------------------------------------------------------------------------------------------------------------------------------------|
| Mackillop et al. 2011b (Large)         | Clinical: $M(SD)$ , $N = 0.02(0.05)^*$ , 23<br>Control: $M(SD)$ , $N = 0.04(1.43)^*$ , 24<br>*Estimated marginal means, see paper for covariates |
| Wang et al. 2018a (Immediate)          | Clinical: $M(SD)$ , $N = 0.54(0.67)$ , 25<br>Control: $M(SD)$ , $N = 0.19(0.79)$ , 30                                                            |
| Wang et al. 2018b (Delayed)            | Clinical: $M(SD)$ , $N = 0.57(0.71)$ , 25<br>Control: $M(SD)$ , $N = 0.16(0.77)$ , 30                                                            |
| Wing et al. 2012                       | Clinical: $M(SD)$ , $N = -4.65(1.27)$ , 34<br>Control: $M(SD)$ , $N = -4.52(1.17)$ , 37                                                          |
| Yu et al. 2017                         | Clinical: $M(SD)$ , $N = 0.10(0.05)$ , 47<br>Control: $M(SD)$ , $N = 0.07(0.06)$ , 42                                                            |
| <b>Borderline Personality Disorder</b> |                                                                                                                                                  |
| Barker et al. 2015                     | Clinical: $M(SD)$ , $N = -4.03(1.88)$ , 19<br>Control: $M(SD)$ , $N = -5.40(1.82)$ , 21                                                          |
| Berenson et al. 2016a (Hypothetical)   | Clinical: $M(SD)$ , $N = -4.01(2.01)$ , 35<br>Control: $M(SD)$ , $N = -4.32(1.95)$ , 45                                                          |
| Berenson et al. 2016b (Actual)         | Clinical: $M(SD)$ , $N = -3.82(1.54)$ , 35<br>Control: $M(SD)$ , $N = -5.01(1.54)$ , 45                                                          |
| Coffey et al. 2011                     | Clinical: $M(SD)$ , $N = -2.69(2.28)$ , 19<br>Control: $M(SD)$ , $N = -3.42(2.02)$ , 28                                                          |
| Dougherty et al. 1999                  | Clinical: $M(SD)$ , $N = 0.60(0.27)$ , 13<br>Control: $M(SD)$ , $N = 0.59(0.28)$ , 17                                                            |
| Krause-Utz et al. 2016                 | Clinical: $M(SD)$ , $N = -3.30(1.50)$ , 25<br>Control: $M(SD)$ , $N = -4.90(1.43)$ , 24                                                          |
| Lawrence et al. 2010                   | Cohen's $d = 1.24$ ; $SE = 0.284$                                                                                                                |
| Maraz et al. 2016                      | Clinical: $M(SD)$ , $N = -1.61(1.07)$ , 36<br>Control: $M(SD)$ , $N = -2.08(0.98)$ , 111                                                         |
| <b>Bipolar Disorder</b>                |                                                                                                                                                  |
| Ahn et al. 2011                        | Clinical: $M(SD)$ , $N = -2.49(2.00)$ , 22<br>Control: $M(SD)$ , $N = -4.68(1.80)$ , 30                                                          |
| Brown et al. 2018                      | Clinical: $M(SD)$ , $N = -3.57(2.77)$ , 16<br>Control: $M(SD)$ , $N = -5.51(2.12)$ , 61                                                          |
| Strakowski et al 2010                  | Clinical: $M(SD)$ , $N = 47.00(28.00)$ , 108<br>Control: $M(SD)$ , $N = 33.00(22.00)$ , 48                                                       |

|                                      |                                                                                           |
|--------------------------------------|-------------------------------------------------------------------------------------------|
| Urošević et al. 2016                 | Clinical: $M(SD)$ , $N = 0.58(0.03)$ , 32<br>Control: $M(SD)$ , $N = 0.47(0.28)$ , 32     |
| <b>Obsessive Compulsive Disorder</b> |                                                                                           |
| Norman et al. 2017                   | Clinical: $M(SD)$ , $N = 0.03(0.03)$ , 20<br>Control: $M(SD)$ , $N = 0.02(0.01)$ , 20     |
| Pinto et al. 2014a (Delay)           | Clinical: $M(SD)$ , $N = 0.73(0.25)$ , 25<br>Control: $M(SD)$ , $N = 0.73(0.25)$ , 25     |
| Pinto et al. 2014b (Accelerate)      | Clinical: $M(SD)$ , $N = 0.58(0.33)$ , 25<br>Control: $M(SD)$ , $N = 0.58(0.30)$ , 25     |
| Sohn et al. 2014                     | Clinical: $M(SD)$ , $N = -4.04(2.50)$ , 80<br>Control: $M(SD)$ , $N = -5.09(1.81)$ , 76   |
| Steinglass et al. 2017               | Clinical: $M(SD)$ , $N = 0.01(0.02)$ , 50<br>Control: $M(SD)$ , $N = 0.01(0.01)$ , 75     |
| <b>Bulimia Nervosa</b>               |                                                                                           |
| Bartholdy et al. 2017                | Clinical: $M(SD)$ , $N = 0.41(0.22)$ , 27<br>Control: $M(SD)$ , $N = 0.37(0.22)$ , 28     |
| Kekic et al. 2016a (Accelerate)      | Clinical: $M(SD)$ , $N = 0.68(0.34)$ , 39<br>Control: $M(SD)$ , $N = 0.55(0.35)$ , 53     |
| Kekic et al. 2016b (Delay)           | Clinical: $M(SD)$ , $N = 0.73(0.04)$ , 39<br>Control: $M(SD)$ , $N = 0.58(0.31)$ , 53     |
| Neveu et al. 2014                    | Clinical: $M(SD)$ , $N = 0.002(0.006)$ , 18<br>Control: $M(SD)$ , $N = 0.001(0.002)$ , 18 |
| <b>Binge Eating Disorder</b>         |                                                                                           |
| Bartholdy et al. 2017                | Clinical: $M(SD)$ , $N = 0.64(0.21)$ , 11<br>Control: $M(SD)$ , $N = 0.63(0.22)$ , 28     |
| Davis et al. 2010                    | Clinical $N = 65$ ; Control $N = 71$ Independent groups<br>two-tailed $p = .012$          |
| Manasse et al. 2015                  | Clinical: $M(SD)$ , $N = 0.38(0.16)$ , 31<br>Control: $M(SD)$ , $N = 0.28(0.18)$ , 43     |
| Manwaring et al. 2011                | Clinical: $M(SD)$ , $N = 0.58(0.30)$ , 27<br>Control: $M(SD)$ , $N = 0.52(0.25)$ , 30     |
| Mole et al. 2015                     | Clinical: $M(SD)$ , $N = 0.04(0.05)$ , 30<br>Control: $M(SD)$ , $N = 0.01(0.03)$ , 30     |
| Steward et al. 2017                  | Clinical: $M(SD)$ , $N = 0.19(0.14)$ , 24<br>Control: $M(SD)$ , $N = 0.14(0.10)$ , 80     |

|                                      |                                                                                           |
|--------------------------------------|-------------------------------------------------------------------------------------------|
| Yan et al. 2018                      | Clinical: $M(SD)$ , $N = 0.68(0.38)$ , 85<br>Control: $M(SD)$ , $N = 0.66(0.35)$ , 928    |
| <b>Anorexia Nervosa</b>              |                                                                                           |
| Bartholdy et al. 2017                | Clinical: $M(SD)$ , $N = 0.22(0.20)$ , 28<br>Control: $M(SD)$ , $N = 0.37(0.22)$ , 28     |
| Decker et al. 2015                   | Clinical: $M(SD)$ , $N = 0.54(1.51)$ , 54<br>Control: $M(SD)$ , $N = 0.77(1.47)$ , 39     |
| King et al. 2016                     | Clinical: $M(SD)$ , $N = 0.01(0.01)$ , 31<br>Control: $M(SD)$ , $N = 0.01(0.01)$ , 31     |
| Neveu et al. 2014                    | Clinical: $M(SD)$ , $N = 0.016(0.061)$ , 16<br>Control: $M(SD)$ , $N = 0.001(0.002)$ , 18 |
| Ritschel et al. 2015                 | Clinical: $M(SD)$ , $N = -5.15(1.30)$ , 34<br>Control: $M(SD)$ , $N = -5.14(1.30)$ , 53   |
| Steinglass et al. 2012a (Accelerate) | Clinical: $M(SD)$ , $N = 0.46(0.39)$ , 36<br>Control: $M(SD)$ , $N = 0.63(0.30)$ , 28     |
| Steinglass et al. 2012b (Delay)      | Clinical: $M(SD)$ , $N = 0.62(0.30)$ , 36<br>Control: $M(SD)$ , $N = 0.70(0.21)$ , 28     |
| Steinglass et al. 2017               | Clinical: $M(SD)$ , $N = 0.003(0.060)$ , 27<br>Control: $M(SD)$ , $N = 0.007(0.011)$ , 75 |
| Steward et al. 2017                  | Clinical: $M(SD)$ , $N = 0.10(0.07)$ , 37<br>Control: $M(SD)$ , $N = 0.14(0.10)$ , 80     |
| Wierenga et al. 2015                 | Clinical: $M(SD)$ , $N = 0.53(0.31)$ , 23<br>Control: $M(SD)$ , $N = 0.58(0.31)$ , 17     |

Note: Values rounded to 2 decimal places for presentation in table, unless values contained 2 leading zeros. Exact values in Comprehensive Meta-Analysis Software dataset available upon request from corresponding author. Values are unadjusted means (i.e., not estimated marginal means or covariate adjusted means), unless otherwise specified.

**eTable 3.** Complete Meta-analytic Results by Disorder Category

| Study                                  | g           | 95% CI            | Z           | p            | OSR  | OSR-p   |
|----------------------------------------|-------------|-------------------|-------------|--------------|------|---------|
| <b>Major Depressive Disorder</b>       |             |                   |             |              |      |         |
| Brown et al. 2018                      | 0.25        | -0.17, 0.68       | 1.16        | 0.246        | 0.42 | 0.005   |
| Caceda et al. 2014                     | 0.65        | 0.03, 1.27        | 2.04        | 0.041        | 0.34 | 0.010   |
| Dombrovski et al. 2011                 | 0.21        | -0.25, 0.67       | 0.89        | 0.374        | 0.42 | 0.004   |
| Engelmann et al. 2013                  | 0.89        | 0.10, 1.68        | 2.20        | 0.028        | 0.32 | 0.006   |
| Imhoff et al. 2014                     | 0.87        | 0.23, 1.50        | 2.67        | 0.008        | 0.29 | 0.008   |
| Pulcu et al. 2014                      | 0.36        | -0.18, 0.90       | 1.31        | 0.190        | 0.39 | 0.007   |
| Weidberg et al. 2015                   | 0.00        | 0.43, 0.43        | 0.00        | 0.999        | 0.44 | <0.001  |
| <b>Aggregate</b>                       | <b>0.37</b> | <b>0.14, 0.61</b> | <b>3.08</b> | <b>0.002</b> | --   |         |
| <b>Schizophrenia</b>                   |             |                   |             |              |      |         |
| Ahn et al. 2011                        | 1.20        | 0.60, 1.80        | 3.94        | <0.0001      | 0.39 | 0.014   |
| Avsar et al. 2013                      | 2.51        | 1.53, 3.48        | 5.05        | <0.0001      | 0.34 | 0.011   |
| Brown et al. 2018                      | 0.69        | 0.25, 1.13        | 3.06        | 0.002        | 0.44 | 0.011   |
| Heerey et al. 2007                     | 0.69        | 0.21, 1.17        | 2.81        | 0.005        | 0.44 | 0.011   |
| Heerey et al. 2011                     | 0.42        | -0.10, 0.93       | 1.59        | 0.111        | 0.46 | 0.008   |
| Horan et al. 2017                      | -0.08       | -0.37, 0.21       | -0.56       | 0.579        | 0.52 | 0.002   |
| MacKillop et al. 2011a (Small)         | -0.43       | -1.00, 0.14       | -1.48       | 0.138        | 0.53 | 0.001   |
| MacKillop et al. 2011b (Large)         | -0.02       | -0.58, 0.54       | -0.07       | 0.947        | 0.50 | 0.003   |
| Wang et al. 2018a (Immediate)          | 0.46        | -0.07, 0.99       | 1.72        | 0.086        | 0.46 | 0.008   |
| Wang et al. 2018b (Delayed)            | 0.54        | 0.01, 1.07        | 1.98        | 0.048        | 0.45 | 0.009   |
| Wing et al. 2012                       | -0.11       | -0.57, 0.35       | -0.45       | 0.652        | 0.51 | 0.003   |
| Yu et al. 2017                         | 0.46        | 0.04, 0.88        | 2.15        | 0.031        | 0.46 | 0.009   |
| <b>Aggregate</b>                       | <b>0.46</b> | <b>0.14, 0.77</b> | <b>2.86</b> | <b>0.004</b> | --   |         |
| <b>Borderline Personality Disorder</b> |             |                   |             |              |      |         |
| Barker et al. 2015                     | 1.22        | 0.67, 1.77        | 4.37        | 0.024        | 0.58 | <0.0001 |
| Berenson et al. 2016a (Hypothetical)   | 0.73        | 0.10, 1.36        | 2.26        | 0.487        | 0.67 | <0.001  |
| Berenson et al. 2016b (Actual)         | 0.16        | 0.28, 0.59        | 0.70        | 0.001        | 0.57 | <0.0001 |
| Coffey et al. 2011                     | 0.76        | 0.31, 1.22        | 3.31        | 0.252        | 0.63 | <0.001  |
| Dougherty et al. 1999                  | 0.34        | -0.24, 0.91       | 1.15        | 0.0010       | 0.54 | <0.0001 |
| Krause-Utz et al. 2016                 | 1.07        | 0.48, 1.66        | 3.55        | 0.016        | 0.62 | <0.001  |

|                                      |             |                   |             |                   |      |         |
|--------------------------------------|-------------|-------------------|-------------|-------------------|------|---------|
| Lawrence et al. 2010                 | 0.47        | 0.09, 0.84        | 2.42        | <0.0001           | 0.51 | <0.001  |
| Maraz et al. 2016                    | 0.03        | -0.67, 0.74       | 0.09        | 0.927             | 0.65 | <0.0001 |
| <b>Aggregate</b>                     | <b>0.60</b> | <b>0.32, 0.87</b> | <b>4.21</b> | <b>&lt;0.0001</b> | --   | --      |
| <b>Bipolar Disorder</b>              |             |                   |             |                   |      |         |
| Ahn et al. 2011                      | 1.14        | 0.56, 1.73        | 3.83        | 0.000             | 0.58 | <0.0001 |
| Brown et al. 2018                    | 0.85        | 0.29, 1.41        | 2.96        | 0.003             | 0.64 | 0.001   |
| Strakowski et al 2010                | 0.53        | 0.19, 0.87        | 3.02        | 0.003             | 0.77 | <0.001  |
| Urošević et al. 2016                 | 0.37        | -0.11, 0.86       | 1.50        | 0.133             | 0.78 | <0.0001 |
| <b>Aggregate</b>                     | <b>0.68</b> | <b>0.37, 0.98</b> | <b>4.31</b> | <b>&lt;0.0001</b> | --   |         |
| <b>Obsessive Compulsive Disorder</b> |             |                   |             |                   |      |         |
| Norman et al. 2017                   | 0.45        | -0.16, 1.07       | 1.44        | 0.149             | 0.27 | 0.017   |
| Pinto et al. 2014a (Delay)           | 0.00        | -0.55, 0.55       | 0.00        | 1.000             | 0.34 | 0.001   |
| Pinto et al. 2014b (Accelerate)      | 0.00        | -0.55, 0.55       | 0.00        | 1.000             | 0.34 | 0.001   |
| Sohn et al. 2014                     | 0.48        | 0.16, 0.79        | 2.95        | 0.003             | 0.20 | 0.109   |
| Steinglass et al. 2017               | 0.28        | -0.08, 0.64       | 1.53        | 0.125             | 0.28 | 0.036   |
| <b>Aggregate</b>                     | <b>0.30</b> | <b>0.11, 0.49</b> | <b>3.06</b> | <b>0.002</b>      | --   |         |
| <b>Bulimia Nervosa</b>               |             |                   |             |                   |      |         |
| Bartholdy et al. 2017                | 0.18        | -0.34, 0.70       | 0.67        | 0.501             | 0.47 | 0.001   |
| Kekic et al. 2016a (Accelerate)      | 0.37        | -0.04, 0.79       | 1.77        | 0.077             | 0.43 | 0.004   |
| Kekic et al. 2016b (Delay)           | 0.63        | 0.21, 1.05        | 2.93        | 0.003             | 0.31 | 0.037   |
| Neveu et al. 2014                    | 0.35        | -0.30, 0.99       | 1.06        | 0.291             | 0.42 | 0.001   |
| <b>Aggregate</b>                     | <b>0.41</b> | <b>0.17, 0.65</b> | <b>3.38</b> | <b>0.001</b>      | --   |         |
| <b>Binge Eating Disorder</b>         |             |                   |             |                   |      |         |
| Bartholdy et al. 2017                | 0.05        | -0.64, 0.73       | 0.13        | 0.897             | 0.37 | 0.001   |
| Davis et al. 2010                    | 0.43        | 0.10, 0.77        | 2.52        | 0.012             | 0.31 | 0.010   |
| Manasse et al. 2015                  | 0.58        | 0.11, 1.04        | 2.42        | 0.016             | 0.37 | 0.007   |
| Manwaring et al. 2011                | 0.20        | -0.31, 0.72       | 0.77        | 0.440             | 0.29 | 0.003   |
| Mole et al. 2015                     | 0.74        | 0.22, 1.25        | 2.79        | 0.005             | 0.32 | 0.005   |
| Steward et al. 2017                  | 0.50        | 0.04, 0.95        | 2.12        | 0.034             | 0.45 | 0.007   |
| Yan et al. 2018                      | 0.06        | -0.17, 0.28       | 0.50        | 0.617             | 0.33 | <0.0001 |
| <b>Aggregate</b>                     | <b>0.34</b> | <b>0.13, 0.56</b> | <b>3.19</b> | <b>0.001</b>      | --   |         |



| <b>Anorexia Nervosa</b>              |              |                     |              |              |           |         |
|--------------------------------------|--------------|---------------------|--------------|--------------|-----------|---------|
| Bartholdy et al. 2017                | -0.70        | -1.24, -0.17        | -2.59        | 0.010        | -0.27     | 0.001   |
| Decker et al. 2015                   | -0.48        | -0.89, -0.06        | -2.25        | 0.024        | -0.27     | 0.003   |
| King et al. 2016                     | -0.10        | -0.59, 0.39         | -0.41        | 0.682        | -0.32     | <0.001  |
| Neveu et al. 2014                    | 0.35         | -0.31, 1.02         | 1.05         | 0.295        | -0.34     | <0.0001 |
| Ritschel et al. 2015                 | 0.00         | -0.43, 0.42         | -0.02        | 0.983        | -0.35     | <0.0001 |
| Steinglass et al. 2012a (Accelerate) | -0.47        | -0.97, 0.02         | -1.88        | 0.060        | -0.28     | 0.002   |
| Steinglass et al. 2012b (Delay)      | -0.30        | -0.79, 0.19         | -1.19        | 0.233        | -0.30     | 0.001   |
| Steinglass et al. 2017               | -0.40        | -0.84, 0.04         | -1.78        | 0.075        | -0.29     | 0.002   |
| Steward et al. 2017                  | -0.42        | -0.81, -0.03        | -2.09        | 0.036        | -0.28     | 0.003   |
| Wierenga et al. 2015                 | -0.16        | -0.78, 0.46         | -0.51        | 0.611        | -0.31     | 0.001   |
| <b>Aggregate</b>                     | <b>-0.30</b> | <b>-0.46, -0.14</b> | <b>-3.62</b> | <b>0.000</b> | <b>--</b> |         |

Note: CI = 95% Confidence Interval; OSR = One Study Removed (i.e., aggregate effect size when study iteratively removed from analysis).

**eTable 4.** Studies Excluded at Full-Text Stage with Reasons for Exclusion

| <b>Study</b>                 | <b>Diagnostic Category</b>                                                          | <b>Reason for Exclusion</b>                                    |
|------------------------------|-------------------------------------------------------------------------------------|----------------------------------------------------------------|
| Ahn et al. 2016              | Depression, Anxiety, Psychopathy, Conduct Disorder, Antisocial Personality Disorder | No association between discounting and clinical group/variable |
| Amlung et al. 2017           | Depression                                                                          | Non-relevant sample                                            |
| Andrade et al. 2014          | Antisocial Personality Disorder                                                     | Non-relevant sample                                            |
| Audrain-McGovern et al. 2009 | Depression                                                                          | No association between discounting and clinical group/variable |
| Audrain-McGovern et al. 2009 | Depression                                                                          | No association between discounting and clinical group/variable |
| Barkley et al. 2011          | Oppositional Defiant Disorder, Conduct Disorder                                     | Non-relevant sample                                            |
| Bobova et al. 2009           | Conduct Disorder                                                                    | Non-relevant sample                                            |
| Brennan et al. 2010          | Antisocial behaviour                                                                | No association between discounting and clinical group/variable |
| Bridge et al. 2015           | Suicidality, Affective Disorders                                                    | No association between discounting and clinical group/variable |
| Buchanan et al. 2015         | Schizophrenia                                                                       | No association between discounting and clinical group/variable |
| Cáceda et al. 2018           | Suicidality, Depression, Bipolar Disorder, Anxiety                                  | No association between discounting and clinical group/variable |
| Call et al. 2017             | Eating Disorders, Depression, Anxiety                                               | Non-relevant sample                                            |
| Castellanos-Ryan et al. 2014 | Conduct Disorder                                                                    | No association between discounting and clinical group/variable |
| Castellanos-Ryan et al. 2016 | Oppositional Defiant Disorder, Conduct Disorder                                     | No association between discounting and clinical group/variable |
| Clare et al. 2010            | Depression, Anxiety                                                                 | No discounting task                                            |
| Crean et al. 2000            | Borderline Personality Disorder, Bipolar Disorder, Antisocial Personality Disorder, | Non-relevant sample                                            |
| Culbreth et al. 2016         | Schizophrenia                                                                       | No discounting task                                            |
| Dai et al. 2016              | Externalizing symptoms                                                              | No original data                                               |
| Dennhardt et al. 2011        | Depression                                                                          | Non-relevant sample                                            |
| Docx et al. 2015             | Schizophrenia                                                                       | Non-relevant sample                                            |
| Dom et al. 2006              | Cluster-B Personality Disorder                                                      | No association between discounting and clinical group/variable |

|                         |                                                           |                                                                |
|-------------------------|-----------------------------------------------------------|----------------------------------------------------------------|
| Dombrovski et al. 2012  | Depression                                                | Overlapping sample                                             |
| Dong et al. 2016        | Restrained Eating                                         | Non-relevant sample                                            |
| Dutra et al. 2015       | Bipolar Disorder                                          | No discounting task                                            |
| Duva et al. 2011        | Schizophrenia                                             | No discounting task                                            |
| Farris et al. 2017      | Psychopathology                                           | Non-relevant sample                                            |
| Finn et al. 2015        | Conduct Disorder, Antisocial Personality Disorder         | Non-relevant sample                                            |
| Fortgang et al. 2018    | Schizophrenia                                             | Non-relevant sample                                            |
| Gerst et al. 2017       | Antisocial Psychopathology                                | No association between discounting and clinical group/variable |
| Gonzalez et al. 2011    | Depression                                                | Non-relevant sample                                            |
| Gunn et al. 2018        | Antisocial Personality Disorder                           | Overlapping sample                                             |
| Hartmann et al. 2015    | Schizophrenia                                             | No discounting task                                            |
| Hermann et al. 2015     | Depression                                                | No discounting index                                           |
| Hosking et al. 2017     | Psychopathy                                               | Non-relevant sample                                            |
| Janis et al. 2009       | Self-injurious behaviour, Mood Disorder, Anxiety Disorder | Non-relevant sample                                            |
| Jarmolowicz et al. 2014 | Depression                                                | Non-relevant sample                                            |
| Jenks et al. 2015       | Social Anxiety                                            | Non-relevant sample                                            |
| Johnson et al. 2017     | Borderline Personality Disorder                           | Non-relevant sample                                            |
| Kalapatapu et al. 2013  | PTSD                                                      | No association between discounting and clinical group/variable |
| Kekic et al. 2017       | Bulimia Nervosa                                           | No association between discounting and clinical group/variable |
| Landes et al. 2018      | Depression                                                | No discounting task                                            |
| Leitch et al. 2013      | Eating behaviour                                          | Non-relevant sample                                            |
| Lempert et al. 2010     | Anhedonia                                                 | Non-relevant sample                                            |
| Levin et al. 2018       | Depression                                                | Non-relevant sample                                            |
| Li et al. 2016          | Schizophrenia                                             | Non-relevant sample                                            |
| Lijffijt et al. 2017    | Antisocial Personality Disorder                           | Insufficient numbers in study category                         |
| Lister et al. 2015      | Axis I and Axis II Psychiatric Disorders                  | No association between discounting and clinical group/variable |
| Ludwig et al. 2015      | Depression, Anxiety                                       | No discounting task                                            |
| Manasse et al. 2014     | Binge Eating                                              | Non-relevant sample                                            |
| Manasse et al. 2015     | Binge Eating                                              | Non-relevant sample                                            |

|                             |                                                       |                                                                |
|-----------------------------|-------------------------------------------------------|----------------------------------------------------------------|
| Manasse et al. 2016         | Binge Eating Disorder                                 | No association between discounting and clinical group/variable |
| Mason et al. 2012           | Hypomania                                             | Non-relevant sample                                            |
| McClelland et al. 2016      | Anorexia                                              | Experimental manipulation                                      |
| Melanko et al. 2009         | Psychopathy                                           | Non-relevant sample                                            |
| Meyer et al. 2015           | Hypomania                                             | Non-relevant sample                                            |
| Mies et al. 2016            | Depression                                            | Non-relevant sample                                            |
| Miller et al. 2003          | Psychopathy                                           | Non-relevant sample                                            |
| Mishra et al. 2017          | Antisocial behaviour                                  | No association between discounting and clinical group/variable |
| Moody et al. 2016           | Depression, Antisocial Personality Disorder           | Non-relevant sample                                            |
| Morgan et al. 2011          | Psychopathy                                           | Non-relevant sample                                            |
| Mostert et al. 2015         | Depression                                            | No association between discounting and clinical group/variable |
| Murphy et al. 2017          | Depression, Anxiety                                   | No association between discounting and clinical group/variable |
| Nicolai et al. 2017         | Obsessive-Compulsive Symptoms                         | Non-relevant sample                                            |
| Olson et al. 2017           | PTSD, Anhedonia                                       | Insufficient numbers in study category                         |
| Ong et al. 2018             | Obsessive Compulsive Symptoms                         | Non-relevant sample                                            |
| Petry et al. 2002           | Antisocial Personality Disorder                       | No association between discounting and clinical group/variable |
| Privitera et al. 2015       | Depression                                            | Non-relevant sample                                            |
| Rounds et al. 2007          | Social Anxiety                                        | Non-relevant sample                                            |
| Sanchez-Roige et al. 2018   | Depression, Schizophrenia, Anorexia, Bipolar Disorder | Non-relevant sample                                            |
| Sargent et al. 2012         | Antisocial Personality Disorder                       | Non-relevant sample                                            |
| Scherr et al. 2010          | Eating Disorders, Anxiety                             | Non-relevant sample                                            |
| Sherman et al. 2017         | Psychopathy                                           | Non-relevant sample                                            |
| Simmen-Janevska et al. 2015 | PTSD                                                  | Insufficient numbers in study category                         |
| Soltis et al. 2017          | Depression                                            | Non-relevant sample                                            |
| Stojek et al. 2014          | Binge Eating                                          | Non-relevant sample                                            |
| Swann et al. 2002           | Conduct Disorder, Oppositional Defiant Disorder       | Non-relevant sample                                            |
| Szuhany et al. 2018         | Depression                                            | Non-relevant sample                                            |
| Takahashi et al. 2008       | Depression, Bipolar Disorder                          | Data not available                                             |

|                              |                               |                                                                |
|------------------------------|-------------------------------|----------------------------------------------------------------|
| Takahashi et al. 2014        | Psychopathy                   | Non-relevant sample                                            |
| Tanovic et al. 2018          | Anxiety                       | Experimental manipulation                                      |
| Thamotharan et al. 2015      | Disordered Eating             | No association between discounting and clinical group/variable |
| vandenBerk-Clark et al. 2018 | PTSD                          | Insufficient numbers in study category                         |
| VanderOord et al. 2018       | Binge Eating                  | No association between discounting and clinical group/variable |
| Vanyukov et al. 2016         | Depression                    | No discounting index                                           |
| Vassileva et al. 2011        | Psychopathy                   | Non-relevant sample                                            |
| Vicario et al. 2018          | Anorexia                      | No discounting task                                            |
| Vickers et al. 2016          | Hoarding                      | Non-relevant sample                                            |
| Voon et al. 2015             | Binge Eating Disorder         | No original data                                               |
| Weatherly et al. 2012        | Schizophrenia                 | Non-relevant sample                                            |
| Weller et al. 2014           | Schizophrenia                 | Overlapping sample                                             |
| White et al. 2014            | Psychopathy, Conduct Disorder | Non-relevant sample                                            |
| Willoughby et al. 2015       | Depression                    | No discounting task                                            |
| Wing et al. 2013             | Schizophrenia                 | Overlapping sample                                             |
| Xia et al. 2017              | Anxiety                       | Non-relevant sample                                            |
| Yamane et al. 2013           | Depression                    | No association between discounting and clinical group/variable |
| Yeomans et al. 2008          | Eating Disorders              | Non-relevant sample                                            |
| Yoon et al. 2007             | Depression                    | Non-relevant sample; no clinical diagnosis                     |
| Zhao et al. 2015             | Anxiety                       | Experimental manipulation                                      |
